# Supplementary material for: Paddy-Lilium Crop Rotation Improves Potential Beneficial Soil Fungi and Alleviates Soil Acidification in Lilium Cropping Soil
Source: MDPI journal article supplement (doi:10.3390/agronomy14010161), 2024-01-11
Supplement: s1 [file s1]

**Table S1** Management information for the three cropping patterns

|                      |                                                                                                                                                                                                                                                                                                                                                                                                                                              |                                                                                                                                                                                                                                                                                                                                                                           |                                                                                                                                                                                                                                                                                                                                                                          |
|----------------------|----------------------------------------------------------------------------------------------------------------------------------------------------------------------------------------------------------------------------------------------------------------------------------------------------------------------------------------------------------------------------------------------------------------------------------------------|---------------------------------------------------------------------------------------------------------------------------------------------------------------------------------------------------------------------------------------------------------------------------------------------------------------------------------------------------------------------------|--------------------------------------------------------------------------------------------------------------------------------------------------------------------------------------------------------------------------------------------------------------------------------------------------------------------------------------------------------------------------|
| Cropping mode        | <i>Lilium</i><br>continuous cropping                                                                                                                                                                                                                                                                                                                                                                                                         | Corn- <i>Lilium</i><br>rotation                                                                                                                                                                                                                                                                                                                                           | Rice- <i>Lilium</i><br>rotation                                                                                                                                                                                                                                                                                                                                          |
| Life form            | Annual                                                                                                                                                                                                                                                                                                                                                                                                                                       | Annual                                                                                                                                                                                                                                                                                                                                                                    | Annual                                                                                                                                                                                                                                                                                                                                                                   |
| Crop species         | <i>Lanceleaf Lilium</i>                                                                                                                                                                                                                                                                                                                                                                                                                      | <i>Lilium</i> : <i>Lanceleaf Lilium</i><br>Corn: Zhongyu 22 hao                                                                                                                                                                                                                                                                                                           | <i>Lilium</i> : <i>Lanceleaf Lilium</i><br>Rice: Hybrid Rice Liangyou 1 Hao                                                                                                                                                                                                                                                                                              |
| Tillage              | <i>Lilium</i> : tillage to a depth of 20 cm in January, May and June 2021, 2022.                                                                                                                                                                                                                                                                                                                                                             | <i>Lilium</i> : tillage to a depth of 20 cm in January, May and June 2021.<br>Corn: tillage to a depth of 30 cm in March and May 2022.                                                                                                                                                                                                                                    | <i>Lilium</i> : tillage to a depth of 20 cm in January, May and June 2021;<br>Rice: tillage to a depth of 30 cm before transplant rice seedlings in 2022.                                                                                                                                                                                                                |
| Plant                | the bulb planting in October 2021, 2022.                                                                                                                                                                                                                                                                                                                                                                                                     | <i>Lilium</i> : the bulb planting in October 2021;<br>Corn: transplanting in March 2022.                                                                                                                                                                                                                                                                                  | <i>Lilium</i> : the bulb planting in October 2021;<br>Rice: transplanting in June 2022.                                                                                                                                                                                                                                                                                  |
| Harvest              | The underground biomass is harvested in July to October 2021, 2022.                                                                                                                                                                                                                                                                                                                                                                          | <i>Lilium</i> : the underground biomass is harvested in July to October 2021;<br>Corn: the aboveground biomass is harvested in July 2022.                                                                                                                                                                                                                                 | <i>Lilium</i> : the underground biomass is harvested in July to October 2021;<br>Rice: harvest happened in the middle of October 2022.                                                                                                                                                                                                                                   |
| Fertilization        | three times fertilizer<br>1) Bases fertilizer before seeding: compound fertilizer, 3750 kg/hm <sup>2</sup> (N:P:K=15:15:15);<br>2) In the middle of March every year, biological fertilizer, 750 kg/hm <sup>2</sup> (NY525-2012, total nutrient >6%) and compound fertilizer (600 kg/hm <sup>2</sup> ) was added at the seedling stage;<br>3) In late May of the annual bud period, compound fertilizer (600 kg/hm <sup>2</sup> ) was added. | <i>Lilium</i> : same to <i>Lilium</i> cropping;<br>Corn: two times fertilizer<br>1) Bases fertilizer before seeding: compound fertilizer, N(120 kg/hm <sup>2</sup> ), P <sub>2</sub> O <sub>5</sub> (150 kg/hm <sup>2</sup> ), K <sub>2</sub> O(75 kg/hm <sup>2</sup> );<br>2) In the middle of May N(120 kg/hm <sup>2</sup> ), K <sub>2</sub> O(75 kg/hm <sup>2</sup> ). | <i>Lilium</i> : same to <i>Lilium</i> cropping;<br>Rice: two times fertilizer<br>1) Bases fertilizer before seeding: compound fertilizer, N(117 kg/hm <sup>2</sup> ), P <sub>2</sub> O <sub>5</sub> (75 kg/hm <sup>2</sup> ), K <sub>2</sub> O(81 kg/hm <sup>2</sup> );<br>2) Tillering fertilizer: N(78 kg/hm <sup>2</sup> ), K <sub>2</sub> O(54 kg/hm <sup>2</sup> ). |
| Replanting frequency | Every year                                                                                                                                                                                                                                                                                                                                                                                                                                   | Every two year                                                                                                                                                                                                                                                                                                                                                            | Every two year                                                                                                                                                                                                                                                                                                                                                           |

**Table S2** Mantel test result for the correlation between soil fungal community composition and environmental variables.

| Variables | R value | <i>P</i> value |
|-----------|---------|----------------|
| pH        | 0.7823  | 0.008          |
| TK        | 0.1754  | 0.1613         |
| TP        | 0.4798  | 0.0166         |
| TN        | 0.5491  | 0.0068         |
| SOC       | 0.4822  | 0.0164         |
| C:N       | 0.2346  | 0.1054         |
| C:P       | 0.5945  | 0.0145         |
| N:P       | 0.4188  | 0.0172         |

**Table S3** The correlation between fungal phyla and soil properties variables.

| Taxon                    | Factor | Cor   | <i>P</i> value |
|--------------------------|--------|-------|----------------|
| <i>Basidiomycota</i>     | pH     | -0.95 | 0.00           |
| <i>Ascomycota</i>        | TN     | -0.78 | 0.02           |
| <i>Aphelidiomycota</i>   | TN     | -0.82 | 0.01           |
| <i>Zoopagomycota</i>     | TN     | -0.77 | 0.02           |
| <i>Ascomycota</i>        | TP     | -0.78 | 0.01           |
| <i>Olpidiomycota</i>     | TP     | -0.68 | 0.04           |
| <i>Aphelidiomycota</i>   | TP     | -0.77 | 0.02           |
| <i>Olpidiomycota</i>     | TK     | -0.89 | 0.00           |
| <i>Aphelidiomycota</i>   | TK     | -0.84 | 0.00           |
| <i>Kickxellomycota</i>   | TK     | -0.69 | 0.04           |
| <i>Mortierellomycota</i> | C:P    | -0.77 | 0.02           |
| <i>Rozellomycota</i>     | C:P    | -0.70 | 0.04           |
| <i>Chytridiomycota</i>   | C:P    | -0.87 | 0.00           |
| <i>Mortierellomycota</i> | N:P    | -0.83 | 0.01           |
| <i>Chytridiomycota</i>   | N:P    | -0.85 | 0.00           |

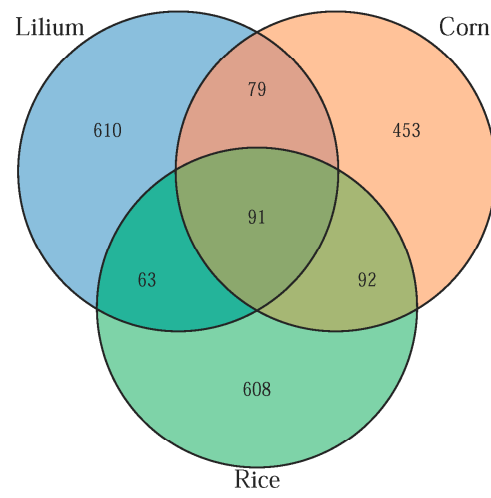

**Figure S1** Venn of soil fungi under different cropping modes. Lilium: continuous cropping with *Lilium*, Corn: corn upland rotation with *Lilium*, Rice: paddy rotation with *Lilium*.

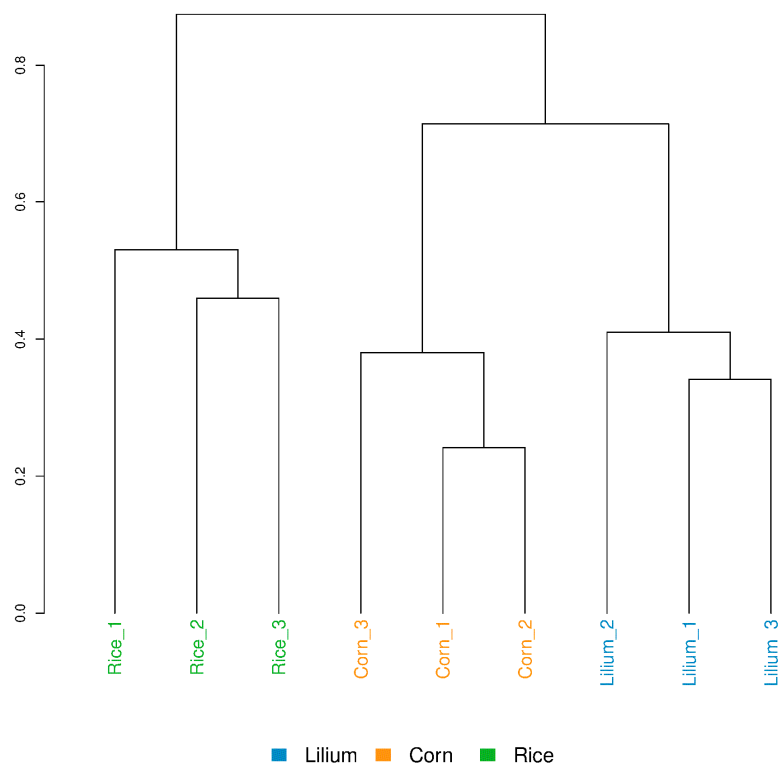

**Figure S2** Hierarchical clustering of fungal communities underlying three different cropping patterns. Lilium: continuous cropping with *Lilium*, Corn: corn upland rotation with *Lilium*, Rice: paddy rotation with *Lilium*.

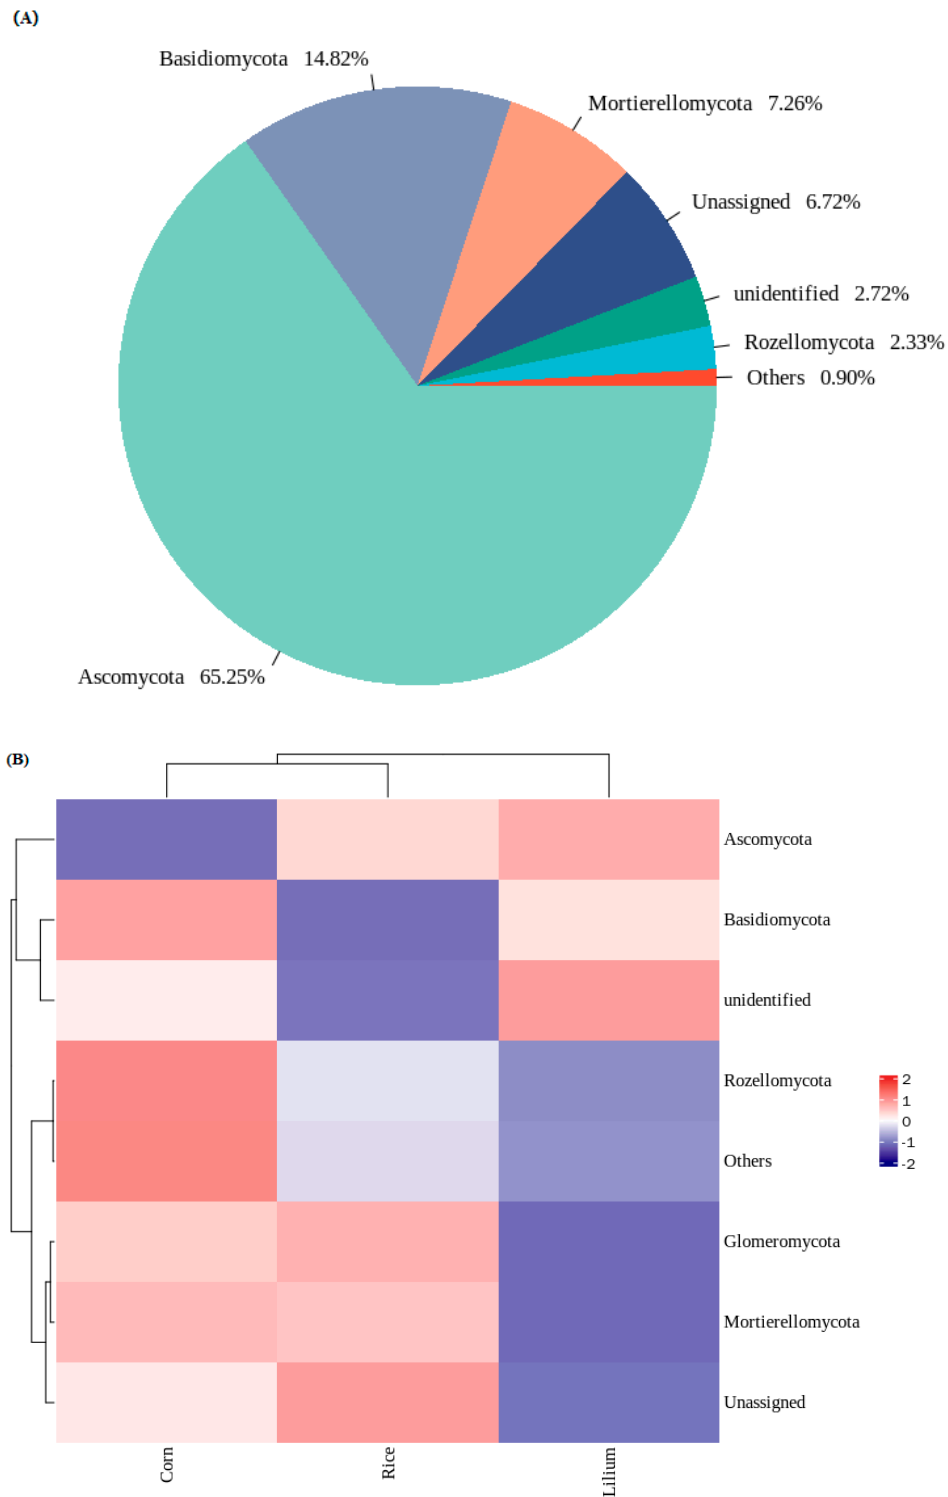

**Figure S3** The barplot showed the relative abundance of the main fungal phyla(A) and the heatmap showed their variations among soil samples at phylum level (B) present in three cropping soils. Lilium: continuous cropping with *Lilium*, Corn: corn upland rotation with *Lilium*, Rice: paddy rotation with *Lilium*.
